# Supplementary material
Source: publisher site journal article supplement (https://www.dovepress.com/article/534729)
Supplement: Supplementary file 1 [file 534729%20Supplementary%20Material_1.docx]

Table S1. Summary of Literature Search Strategy Across Three Databases (PubMed, EBSCO, and Scopus)

| Database | Keyword | Boolean | Retrieved | Date |
| --- | --- | --- | --- | --- |
| PubMed | Nurse OR Nurses OR Nurse Practitioner | ((((Nurse) OR (Nurses[MeSH Terms])) OR (Nurse Practitioner[MeSH Terms])) AND (((Work Life Balance) OR (Work Life Conflict[MeSH Terms])) OR (Work Family Balance[MeSH Terms]))) AND ((Hospital) OR (Hospitals[MeSH Terms])) | 293 | 2 Januari 2025 |
| Work Life balance OR Work Life Conflict OR Work Family Balance |
| Hospital OR Hospitals |
| Ebsco | Nurse OR Nurses OR Nurse Practitioner | (hospital OR hospitals) AND (nurse OR nurses OR nurse practitioner) AND (work life balance OR work life conflict OR work family balance) AND (hospital OR hospitals) | 288 | 2 Januari 2025 |
| Work Life balance OR Work Life Conflict OR Work Family Balance |
| Hospital OR Hospitals |
| Scopus | Nurse OR Nurses OR Nurse Practitioner | “Nurse” OR “Nurses” OR “Nurse Practitioner” AND “Work Life balance” OR “Work Life Conflict” OR “Work Family Balance” AND “Hospital” OR “Hospitals” | 270 | 2 Januari 2025 |
| Work Life balance OR Work Life Conflict OR Work Family Balance |
| Hospital OR Hospitals |
